# Supplementary material for: Can Socioeconomic, Health, and Safety Data Explain the Spread of COVID-19 Outbreak on Brazilian Federative Units?
Source: MDPI journal article supplement (doi:10.3390/ijerph17238921), 2020-11-30
Supplement: s1 [file s1]

# Can Socioeconomic, Health, and Safety Data Explain the Spread of COVID-19 Outbreak on Brazilian Federative Units?

Diego Galvan<sup>1,2,3\*</sup>, Luciane Effting<sup>4</sup>, Hágata Cremasco<sup>4</sup>, Carlos Adam Conte-Junior<sup>1,2,3</sup>

<sup>1</sup> COVID-19 Research Group, Center for Food Analysis (NAL), Technological Development Support Laboratory (LADETEC), Cidade Universitária, Rio de Janeiro, RJ, 21941-598, Brazil; conte@iq.ufrj.br

<sup>2</sup> Laboratory of Advanced Analysis in Biochemistry and Molecular Biology (LAABBM), Department of Biochemistry, Federal University of Rio de Janeiro (UFRJ), Cidade Universitária, Rio de Janeiro, RJ, 21941-909, Brazil

<sup>3</sup> Nanotechnology Network, Carlos Chagas Filho Research Support Foundation of the State of Rio de Janeiro (FAPERJ), Rio de Janeiro, RJ, 20020-000, Brazil

<sup>4</sup> Chemistry Department, State University of Londrina (UEL), Londrina, PR, 86057-970, Brazil; luciane.effting@uel.br; hagata@uel.br

\* Correspondence: diegogalvann@gmail.com; diegogalvann@iq.ufrj.br, orcid: <https://orcid.org/0000-0001-8394-3431>.

## Supporting Information

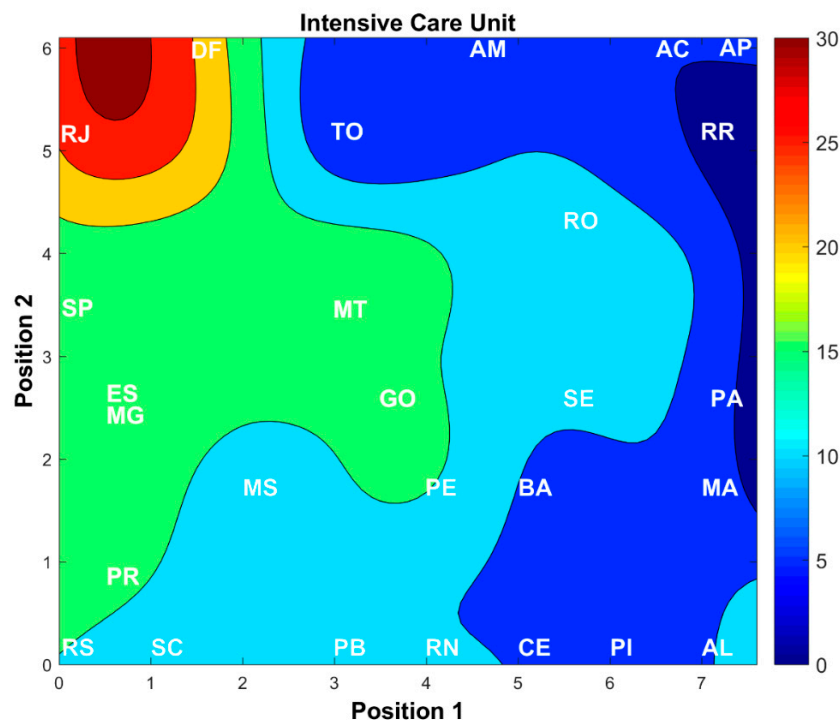

**Figure S1** – Weight maps overlaid by topological maps for variable **Intensive Care Unit (ICU)** by Brazilian federative unit.

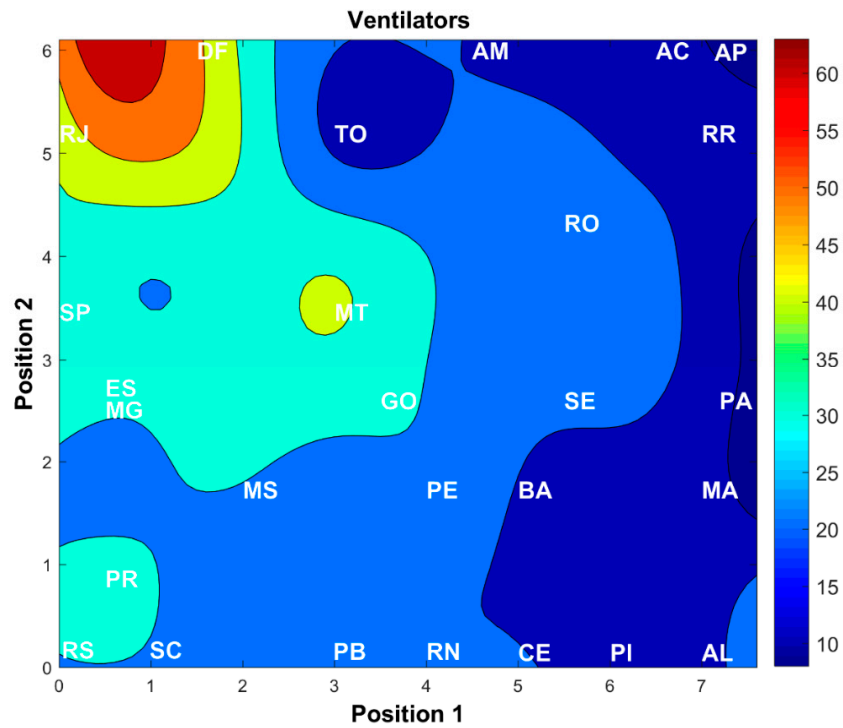

**Figure S2** – Weight maps overlaid by topological maps for variable **Ventilators** by Brazilian federative unit.

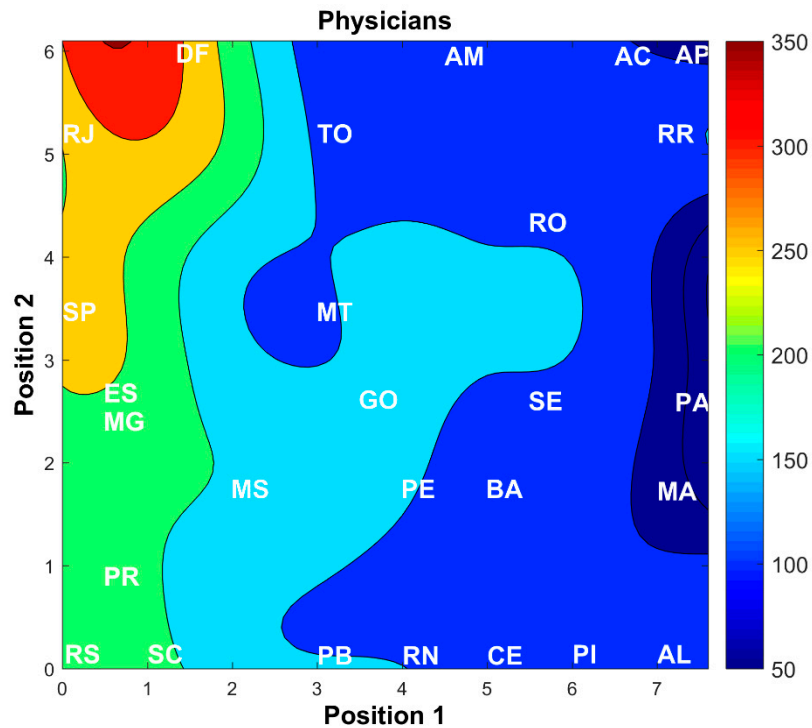

**Figure S3** – Weight maps overlaid by topological maps for variable **Physicians** by Brazilian federative unit.

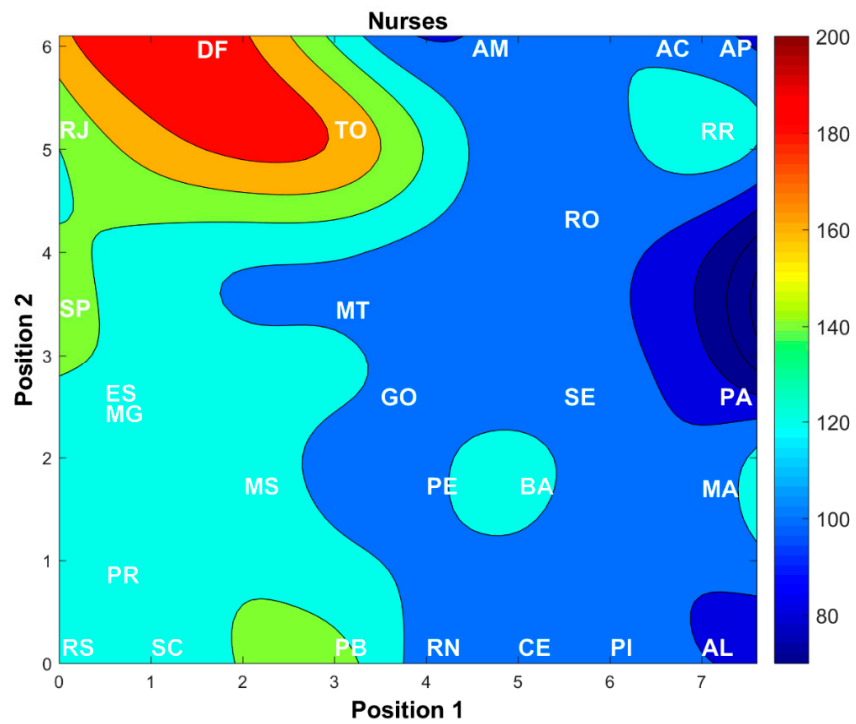

**Figure S4** – Weight maps overlaid by topological maps for variable **Nurses** by Brazilian federative unit.

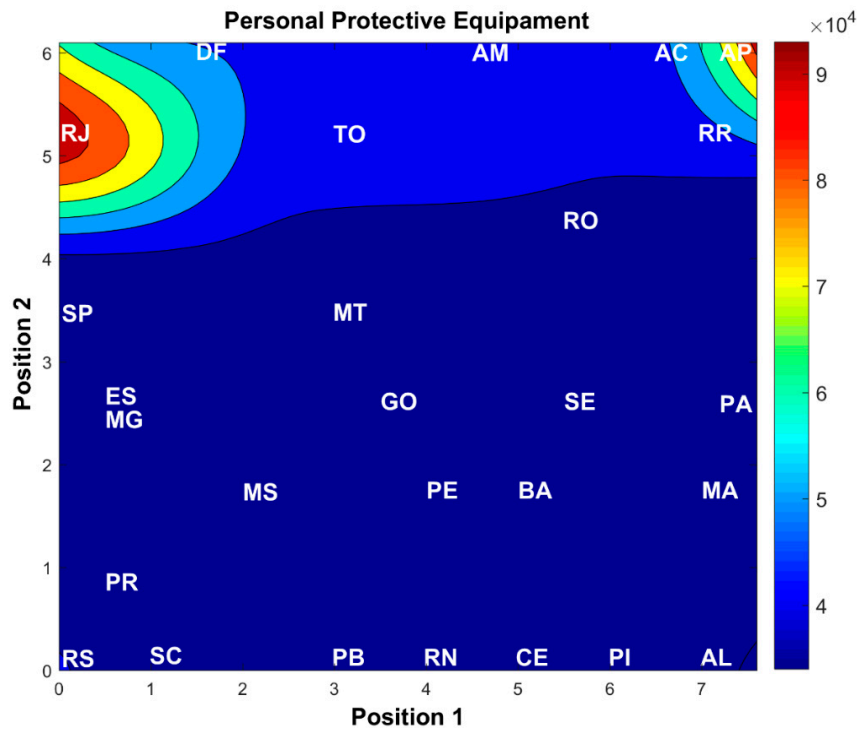

**Figure S5** – Weight maps overlaid by topological maps for variable **Personal Protective Equipment** by Brazilian federative unit.

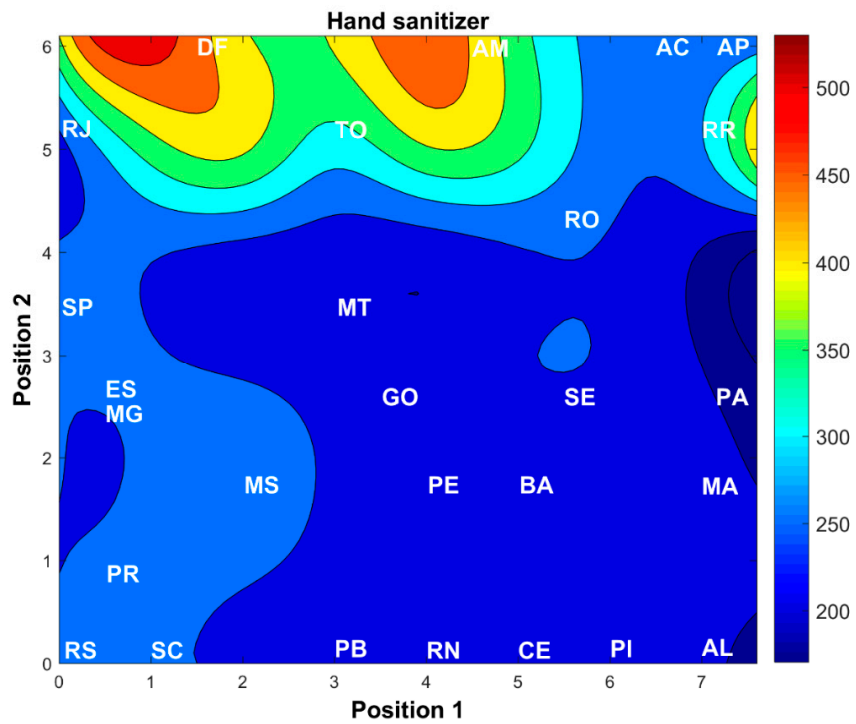

**Figure S6** – Weight maps overlaid by topological maps for variable **Hand sanitizer** by Brazilian federative unit.

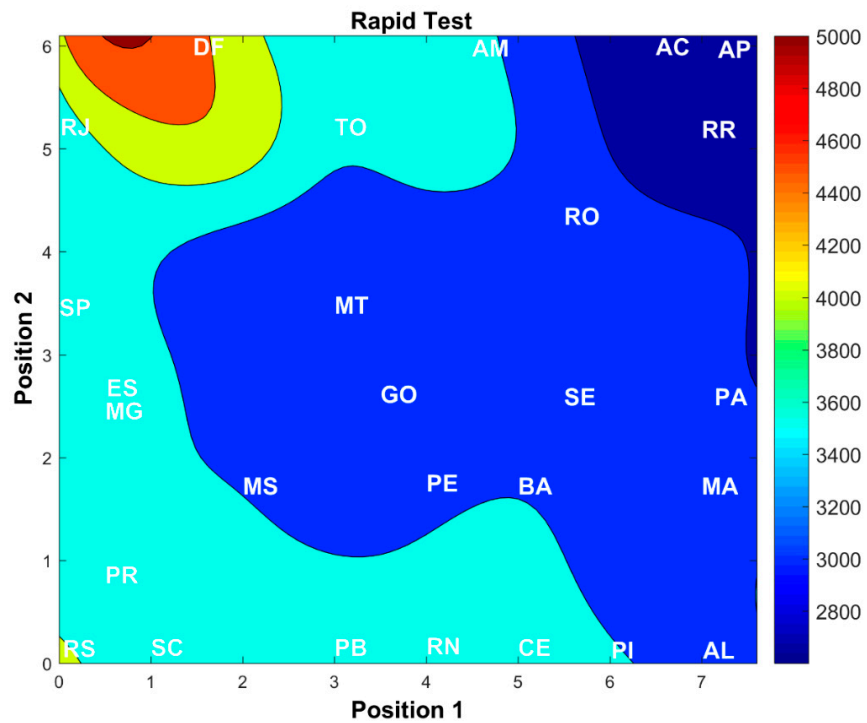

**Figure S7** – Weight maps overlaid by topological maps for variable **Rapid test** by Brazilian federative unit.

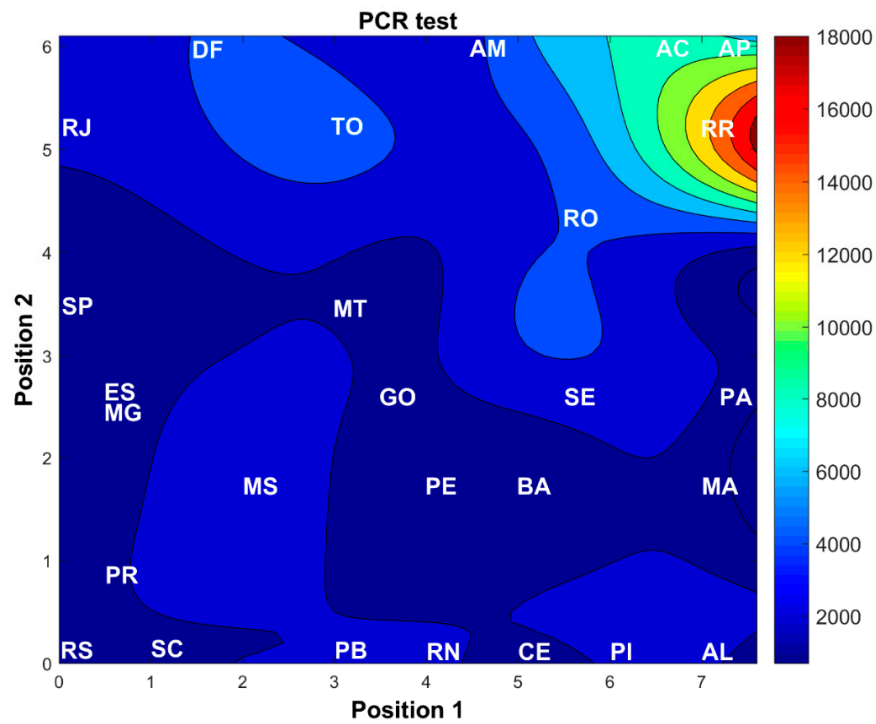

**Figure S8** – Weight maps overlaid by topological maps for variable **PCR test** by Brazilian federative unit.

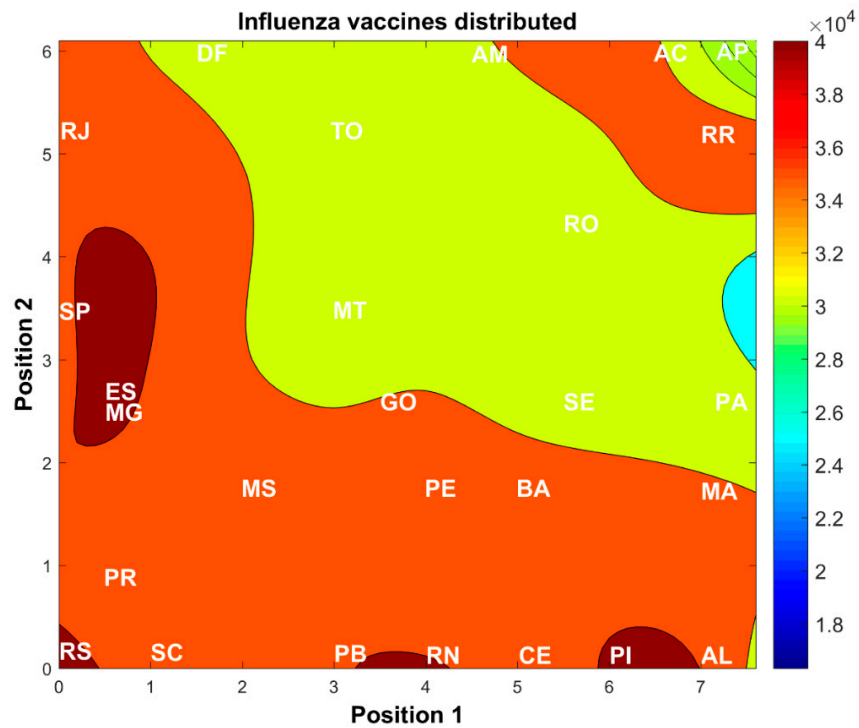

**Figure S9** – Weight maps overlaid by topological maps for variable **Influenza vaccines distributed** by Brazilian federative unit.

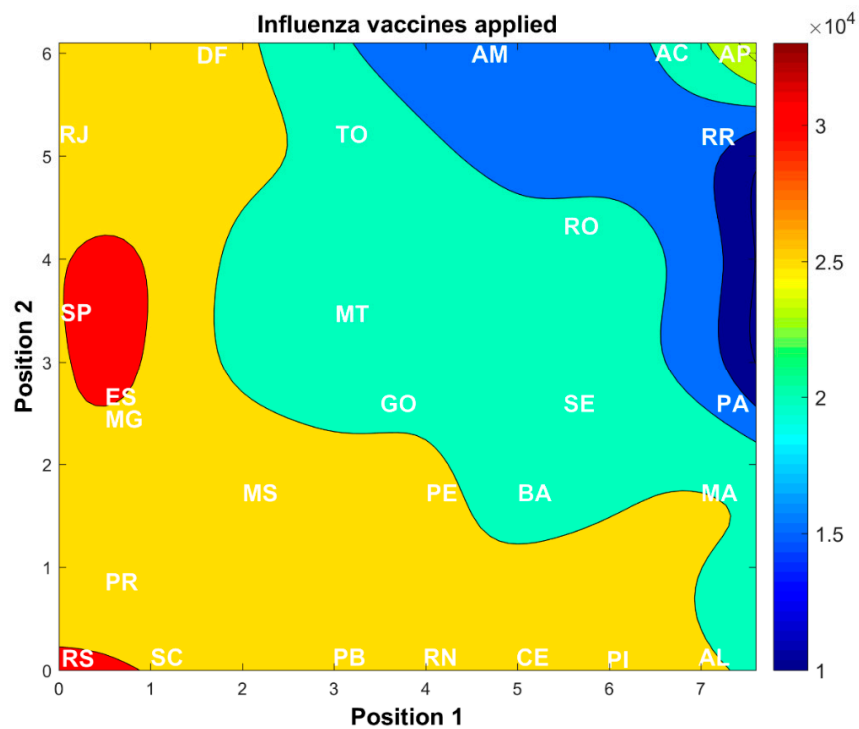

**Figure S10** – Weight maps overlaid by topological maps for variable **Influenza vaccines applied** by Brazilian federative unit.

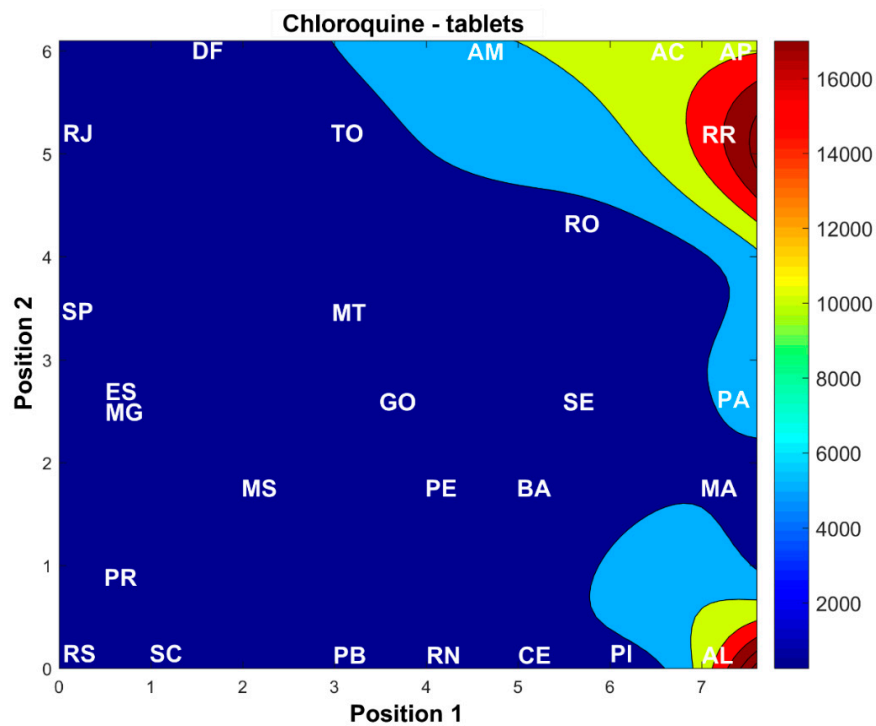

**Figure S11** – Weight maps overlaid by topological maps for variable **Chloroquine tablets** by Brazilian federative unit.

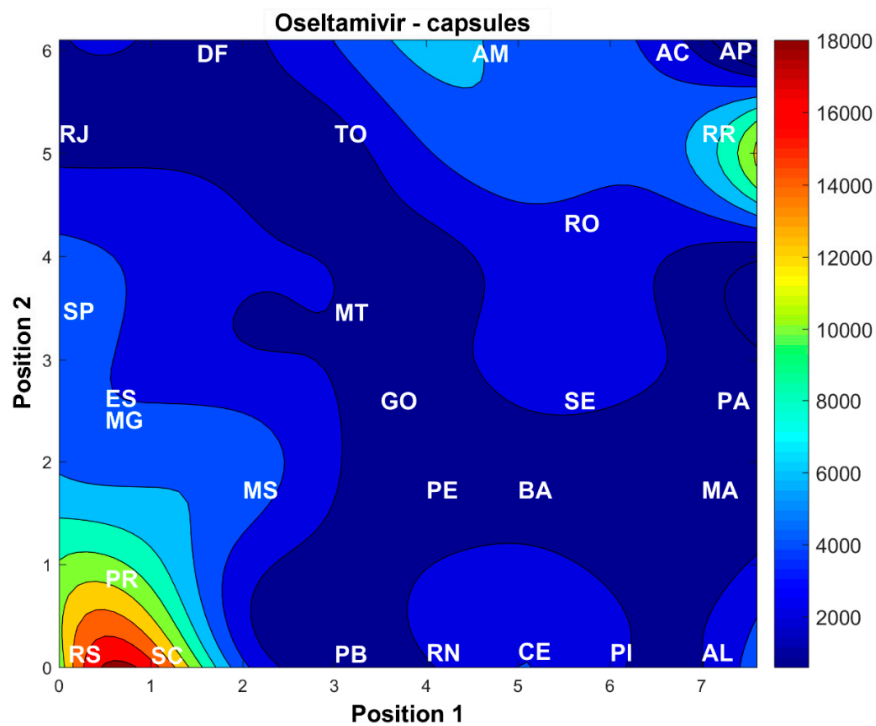

**Figure S12** – Weight maps overlaid by topological maps for variable **Oseltamivir capsules** by Brazilian federative unit.

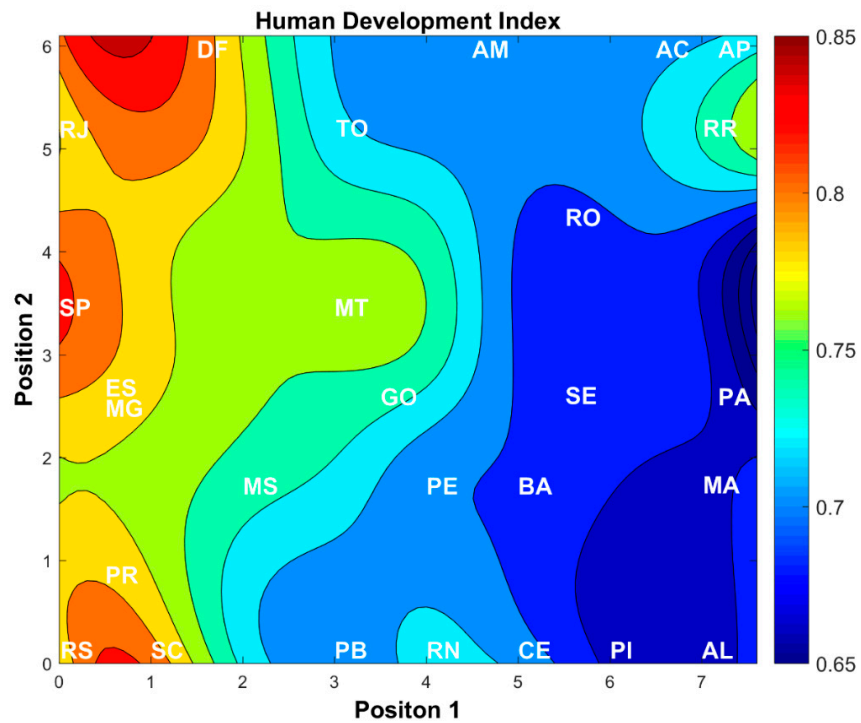

**Figure S13** – Weight maps overlaid by topological maps for variable **Human Development Index (HDI)** by Brazilian federative unit.
